# Supplementary material
Source: PubMed Central journal article supplement (PMC9071398)
Supplement: hmg-2021-ce-00605_r1_brown_supplemental_tables_ddab324.pdf [file hmg-2021-ce-00605_r1_brown_supplemental_tables_ddab324.pdf]

**Table S1. Metabolite Levels in MUT Tissue Relative to WT- 2 Weeks of Age**

| Metabolite                     | Retina- Fold Change |              | Kidney- Fold Change |              | Eyecup- Fold Change |       |
|--------------------------------|---------------------|--------------|---------------------|--------------|---------------------|-------|
|                                | Mean                | SEM          | Mean                | SEM          | Mean                | SEM   |
| 1-Methyladenosine              | 0.361               | 0.102        | 0.745               | 0.069        | 0.990               | 0.267 |
| 2-Hydroxyglutarate/Mevalonate  | 1.025               | 0.115        | 0.821               | 0.204        | 0.823               | 0.072 |
| 2-Methylbutyroylcarnitine      | 2.778               | 0.816        | 1.184               | 0.176        | 0.769               | 0.086 |
| 3-Aminoisobutanoic acid        | 1.791               | 0.488        | 1.051               | 0.064        | 1.154               | 0.188 |
| 3PG                            | 0.908               | 0.163        | <b>2.165</b>        | <b>0.746</b> | 0.945               | 0.104 |
| 4-Hydroxyproline               | 0.901               | 0.149        | 1.046               | 0.119        | 0.876               | 0.138 |
| 5-Oxoproline                   | 0.920               | 0.062        | 0.998               | 0.113        | 0.881               | 0.077 |
| α-Ketoglutarate                | 1.036               | 0.332        | 1.088               | 0.092        | 0.773               | 0.115 |
| Acetyl CoA                     | 0.325               | 0.155        | 0.547               | 0.124        | 0.681               | 0.194 |
| Acetyl L Carnitine             | 1.398               | 0.233        | 1.120               | 0.051        | 1.123               | 0.018 |
| AcetylCholine                  | 2.431               | 0.773        | 0.905               | 0.124        | 0.795               | 0.222 |
| Aconitate                      | 0.601               | 0.232        | 0.717               | 0.219        | 0.699               | 0.128 |
| Adenine                        | 2.154               | 0.917        | 0.751               | 0.132        | 1.254               | 0.143 |
| Adenosine                      | <b>7.295</b>        | <b>2.996</b> | 0.858               | 0.157        | 0.838               | 0.154 |
| ADP                            | 1.826               | 0.888        | 0.996               | 0.124        | 0.793               | 0.192 |
| AICAR                          | 0.401               | 0.198        | 1.206               | 0.200        | 1.039               | 0.139 |
| Alanine                        | 2.682               | 0.819        | 1.019               | 0.084        | 0.922               | 0.092 |
| Alanine                        | 0.998               | 0.080        | 1.135               | 0.092        | 1.136               | 0.099 |
| Amino adipic acid              | 0.580               | 0.302        | 1.043               | 0.134        | 1.084               | 0.178 |
| Arginosuccinate                | 1.743               | 0.398        | 1.309               | 0.197        | 1.532               | 0.173 |
| Ascorbic acid                  | 0.261               | 0.026        | 1.135               | 0.149        | 0.819               | 0.067 |
| Asparagene                     | 0.985               | 0.113        | 1.096               | 0.217        | 1.010               | 0.083 |
| Aspartate                      | 1.019               | 0.076        | 1.110               | 0.053        | 0.909               | 0.097 |
| Aspartic acid                  | 2.694               | 0.793        | 1.159               | 0.052        | 0.922               | 0.099 |
| Betaine                        | 2.227               | 0.679        | 1.023               | 0.008        | 0.962               | 0.081 |
| Biotin                         | 0.875               | 0.064        | 1.377               | 0.235        | 0.823               | 0.088 |
| Butyrylcarnitine               | 1.572               | 0.510        | 0.928               | 0.130        | 0.855               | 0.109 |
| cAMP                           | 1.585               | 0.434        | 1.129               | 0.159        | 0.948               | 0.203 |
| Carnitine                      | 1.689               | 0.482        | 1.128               | 0.040        | 0.815               | 0.060 |
| Carnosine                      | 3.056               | 0.914        | 1.028               | 0.232        | 0.634               | 0.191 |
| Cholesterol                    | 0.812               | 0.110        | 0.882               | 0.211        | 0.510               | 0.109 |
| Choline                        | 2.383               | 0.572        | 1.018               | 0.037        | 1.010               | 0.077 |
| Cis-aconitic acid              | 0.818               | 0.090        | 0.912               | 0.328        | 0.853               | 0.110 |
| Citraconic Acid                | 0.679               | 0.321        | 0.747               | 0.196        | 0.765               | 0.165 |
| Citrate                        | 0.939               | 0.087        | 0.837               | 0.275        | 0.891               | 0.083 |
| Citrulline                     | 0.508               | 0.220        | 1.022               | 0.082        | 0.967               | 0.087 |
| Creatine                       | 1.506               | 0.308        | 0.956               | 0.038        | 1.007               | 0.091 |
| Creatinine                     | 0.886               | 0.066        | 1.075               | 0.059        | 0.753               | 0.130 |
| Cyclic ADP-ribose              | 0.515               | 0.234        | 1.260               | 0.211        | 0.687               | 0.198 |
| Cystathionine                  | 1.113               | 0.186        | 1.436               | 0.284        | 0.735               | 0.182 |
| Cystine                        | 1.920               | 1.127        | 0.969               | 0.106        | 0.976               | 0.084 |
| Cytidine                       | 0.903               | 0.146        | 0.538               | 0.186        | 1.005               | 0.120 |
| D-Ribulose 5-phosphate         | 0.613               | 0.223        | 1.876               | 1.040        | 1.052               | 0.207 |
| Erythritol                     | 0.610               | 0.152        | 1.105               | 0.040        | 0.879               | 0.055 |
| Fumarate                       | 0.956               | 0.105        | 1.115               | 0.072        | 0.834               | 0.089 |
| Gamma-Aminobutyric acid (GABA) | 1.040               | 0.101        | 1.209               | 0.134        | 0.785               | 0.142 |
| Gamma-Aminobutyric acid (GABA) | 1.738               | 0.344        | 1.191               | 0.144        | 2.084               | 1.222 |
| GDP                            | 0.879               | 0.210        | 0.854               | 0.110        | 1.271               | 0.330 |
| Glucose                        | -                   | -            | 0.914               | 0.152        | 0.801               | 0.081 |
| Glucose 1-phosphate            | 1.038               | 0.137        | 1.035               | 0.218        | 0.748               | 0.142 |

|                         |               |              |        |        |       |       |
|-------------------------|---------------|--------------|--------|--------|-------|-------|
| Glucose 6-phosphate     | 1.178         | 0.207        | 0.999  | 0.238  | 0.740 | 0.107 |
| Glutamate               | 0.972         | 0.071        | 1.055  | 0.041  | 0.882 | 0.103 |
| Glutamic acid           | 2.463         | 0.687        | 0.905  | 0.043  | 0.855 | 0.182 |
| Glutamine               | 2.342         | 0.635        | 22.229 | 18.173 | 0.903 | 0.100 |
| Glutamine               | 1.145         | 0.129        | 1.454  | 0.571  | 0.886 | 0.082 |
| Glutathione             | 0.635         | 0.254        | 0.649  | 0.217  | -     | -     |
| Glycerate               | 0.909         | 0.422        | 0.425  | 0.340  | 0.653 | 0.186 |
| Glycine                 | 1.818         | 0.508        | 1.066  | 0.030  | 0.807 | 0.086 |
| Glycine                 | 0.947         | 0.055        | 1.075  | 0.058  | 0.913 | 0.076 |
| GMP                     | 0.764         | 0.155        | 1.293  | 0.198  | 0.887 | 0.162 |
| Guanine                 | 1.516         | 0.565        | 0.885  | 0.117  | 1.350 | 0.185 |
| Guanosine               | 0.895         | 0.254        | 0.749  | 0.142  | 1.144 | 0.238 |
| Guanosine 5'-phosphate  | 0.653         | 0.202        | 0.837  | 0.112  | 0.895 | 0.185 |
| Hexanoylcarnitine       | 0.887         | 0.224        | 0.799  | 0.126  | 0.976 | 0.110 |
| Histidine               | 0.798         | 0.112        | 1.047  | 0.104  | 1.040 | 0.244 |
| Histidine               | 1.009         | 0.177        | 1.095  | 0.122  | 1.033 | 0.217 |
| Hypotaurine             | 0.529         | 0.251        | 1.140  | 0.236  | 0.750 | 0.502 |
| Hypothanxine            | <b>6.794</b>  | <b>3.111</b> | 1.746  | 0.636  | 1.498 | 0.648 |
| Hypoxanthine            | 0.848         | 0.218        | 1.598  | 0.520  | 1.503 | 0.505 |
| IMP                     | 2.399         | 0.706        | 1.134  | 0.145  | 0.820 | 0.113 |
| Inosine                 | 11.666        | 5.160        | 0.913  | 0.053  | 1.058 | 0.155 |
| Inosine                 | <b>10.705</b> | <b>5.945</b> | 0.944  | 0.440  | 1.243 | 0.484 |
| IPP                     | 1.098         | 0.163        | 1.154  | 0.104  | 1.177 | 0.171 |
| Isobutyrylcarnitine     | 1.824         | 0.484        | 0.916  | 0.131  | 0.876 | 0.105 |
| Isocitrate              | 0.725         | 0.117        | 1.030  | 0.194  | 1.346 | 0.129 |
| Isoleucine              | 0.937         | 0.090        | 1.191  | 0.092  | 0.894 | 0.122 |
| L-Arginine              | 0.702         | 0.072        | 1.345  | 0.148  | 1.088 | 0.102 |
| L-Asparagine            | 0.387         | 0.190        | 1.121  | 0.151  | 1.066 | 0.087 |
| L-Homoserine            | 0.926         | 0.090        | 1.050  | 0.041  | 0.918 | 0.136 |
| Lactate                 | 2.390         | 0.639        | 1.131  | 0.035  | 1.160 | 0.090 |
| Lactate                 | 1.226         | 0.088        | 1.279  | 0.046  | 1.061 | 0.090 |
| Leucine                 | 2.192         | 0.680        | 1.179  | 0.061  | 1.049 | 0.131 |
| Leucine                 | 1.118         | 0.147        | 1.315  | 0.130  | 1.079 | 0.120 |
| Lysine                  | 1.568         | 0.420        | 1.183  | 0.095  | 0.785 | 0.123 |
| Lysine                  | 0.875         | 0.097        | 1.199  | 0.109  | 0.800 | 0.137 |
| Malate                  | 2.310         | 0.643        | 1.151  | 0.037  | 0.932 | 0.061 |
| Malate                  | 1.020         | 0.109        | 1.354  | 0.164  | 0.879 | 0.117 |
| Maleic Acid             | 1.023         | 0.010        | 1.020  | 0.033  | 0.996 | 0.010 |
| Methionine              | 2.495         | 0.798        | 1.048  | 0.188  | 1.035 | 0.129 |
| Methionine              | 1.005         | 0.133        | 1.166  | 0.090  | 0.981 | 0.123 |
| Myo inositol            | 2.399         | 0.711        | 1.224  | 0.112  | 1.114 | 0.125 |
| Myristic acid-D27       | 0.997         | 0.045        | 1.106  | 0.054  | 0.956 | 0.035 |
| Myristoylcarnitine      | 1.599         | 0.503        | 0.714  | 0.188  | 0.768 | 0.105 |
| N-alpha-Acetyl-L-lysine | 1.737         | 0.549        | 1.206  | 0.123  | 1.103 | 0.176 |
| N-Asp                   | 0.906         | 0.108        | -      | -      | 0.983 | 0.266 |
| Ornithine               | 0.984         | 0.075        | 1.145  | 0.162  | 0.905 | 0.108 |
| Oxalic acid             | 0.554         | 0.114        | 0.961  | 0.077  | 1.133 | 0.044 |
| Oxalic acid             | 0.853         | 0.076        | 0.940  | 0.100  | 0.945 | 0.084 |
| Oxidized glutathione    | 1.432         | 0.511        | 1.736  | 0.579  | 0.820 | 0.119 |
| Palmitate               | 1.075         | 0.052        | 1.025  | 0.017  | 0.939 | 0.020 |
| Palmitoyl CoA           | 0.377         | 0.130        | 1.069  | 0.193  | 0.873 | 0.204 |
| Palmitoylcarnitine      | 1.687         | 0.142        | 0.758  | 0.144  | 0.808 | 0.092 |
| Pantothenic acid        | 0.462         | 0.125        | 1.138  | 0.075  | 1.165 | 0.173 |

|                        |       |       |              |              |       |       |
|------------------------|-------|-------|--------------|--------------|-------|-------|
| Pantothenic acid       | 1.007 | 0.125 | 1.270        | 0.096        | 0.734 | 0.110 |
| PEP                    | 0.866 | 0.328 | <b>2.169</b> | <b>0.687</b> | 0.815 | 0.114 |
| Phenylalanine          | 0.933 | 0.123 | 1.173        | 0.123        | 1.003 | 0.078 |
| Phenylalanine          | 1.974 | 0.660 | 1.037        | 0.114        | 1.046 | 0.090 |
| Phosphocreatine        | 1.430 | 0.925 | 0.601        | 0.112        | 0.892 | 0.307 |
| Propionylcarnitine     | 3.172 | 0.894 | 1.199        | 0.108        | 0.797 | 0.113 |
| Pyroglutamic acid      | 1.903 | 0.651 | 1.140        | 0.080        | 0.957 | 0.171 |
| Pyruvate               | 1.590 | 0.644 | 0.821        | 0.082        | 0.902 | 0.062 |
| Riboflavin             | 0.359 | 0.179 | 0.837        | 0.169        | 0.937 | 0.128 |
| Serine                 | 1.168 | 0.067 | 0.927        | 0.112        | 0.915 | 0.096 |
| Serine                 | 0.970 | 0.086 | 1.094        | 0.062        | 0.839 | 0.090 |
| Sphinganine            | 0.720 | 0.067 | 0.695        | 0.127        | 0.891 | 0.076 |
| Stearic acid           | 1.077 | 0.039 | 1.031        | 0.017        | 0.986 | 0.017 |
| Stearoylcarnitine      | 1.483 | 1.041 | 0.923        | 0.159        | 0.703 | 0.096 |
| Succinate              | 1.843 | 0.265 | 1.049        | 0.042        | 0.905 | 0.060 |
| Succinate              | 0.984 | 0.136 | 1.197        | 0.134        | 0.874 | 0.089 |
| Succinyl CoEnzyme A    | 0.360 | 0.176 | 0.898        | 0.255        | 1.281 | 0.262 |
| Taurine                | 1.177 | 0.118 | 0.996        | 0.052        | 1.017 | 0.133 |
| Taurine                | 0.972 | 0.051 | 1.143        | 0.117        | 1.105 | 0.104 |
| Thiamine               | 0.676 | 0.325 | 0.954        | 0.227        | 0.966 | 0.307 |
| Thiamine Monophosphate | 0.586 | 0.294 | 0.979        | 0.060        | 0.928 | 0.195 |
| Thiamine Pyrophosphate | 0.379 | 0.186 | 0.931        | 0.149        | 1.307 | 0.235 |
| Threonine              | 0.480 | 0.213 | 0.961        | 0.095        | 0.942 | 0.152 |
| Threonine              | 0.864 | 0.128 | 1.114        | 0.063        | 0.741 | 0.123 |
| Trigonelline           | 1.373 | 0.348 | 1.833        | 0.618        | 1.516 | 0.525 |
| Tryptophan             | 0.491 | 0.218 | 1.008        | 0.116        | 1.039 | 0.244 |
| Tryptophan             | 0.945 | 0.129 | 1.069        | 0.086        | 0.958 | 0.139 |
| Tyrosine               | 0.522 | 0.229 | 0.937        | 0.083        | 1.140 | 0.144 |
| Tyrosine               | 1.032 | 0.139 | 1.257        | 0.111        | 1.150 | 0.105 |
| UDP                    | 1.458 | 0.691 | 0.962        | 0.125        | 0.865 | 0.232 |
| UDP Glucosame          | 0.618 | 0.289 | 1.064        | 0.067        | 0.814 | 0.126 |
| UDP-Glucose            | 0.447 | 0.220 | 0.965        | 0.106        | 0.998 | 0.181 |
| Uracil                 | 0.761 | 0.321 | 1.073        | 0.082        | 1.523 | 0.214 |
| Uracil                 | 1.025 | 0.063 | 1.044        | 0.151        | 0.768 | 0.102 |
| Urate                  | 1.222 | 0.223 | 1.367        | 0.302        | 1.260 | 0.498 |
| Urea                   | 1.020 | 0.107 | 0.826        | 0.123        | 0.869 | 0.158 |
| Valine                 | 1.241 | 0.133 | 1.042        | 0.075        | 1.060 | 0.146 |
| Valine                 | 1.014 | 0.123 | 1.287        | 0.167        | 0.954 | 0.155 |
| Xanthine               | 0.381 | 0.155 | 1.173        | 0.239        | 1.193 | 0.229 |
| Xanthine               | 3.943 | 1.199 | 1.270        | 0.460        | 0.948 | 0.232 |
| XMP                    | 1.848 | 0.389 | 1.287        | 0.206        | 0.774 | 0.103 |

Red bold indicates statistical significance  $P < 0.05$ . - indicates that measurable amounts of that metabolite were not detected. Repeated metabolites represent measurements by both LC/MS and GC/MS.

**Table S2. Metabolite Levels in MUT Tissue Relative to WT- 3 Weeks of Age**

| Metabolite                    | Retina- Fold Change |              | Kidney- Fold Change |              | Eyecup- Fold Change |              |
|-------------------------------|---------------------|--------------|---------------------|--------------|---------------------|--------------|
|                               | Mean                | SEM          | Mean                | SEM          | Mean                | SEM          |
| 1-Methyladenosine             | 0.776               | 0.053        | 0.820               | 0.152        | 0.912               | 0.088        |
| 2-Hydroxyglutarate/Mevalonate | 0.916               | 0.042        | 0.726               | 0.052        | 0.905               | 0.063        |
| 2-Methylbutyroylcarnitine     | <b>2.457</b>        | <b>0.489</b> | 1.013               | 0.126        | 1.115               | 0.174        |
| 3-Aminoisobutanoic acid       | 0.981               | 0.025        | 0.947               | 0.022        | 1.061               | 0.089        |
| 3PG                           | 0.992               | 0.097        | <b>2.713</b>        | <b>1.435</b> | 1.677               | 0.478        |
| 5-Oxoproline                  | 1.143               | 0.048        | 0.588               | 0.053        | 0.823               | 0.108        |
| $\alpha$ -Ketoglutarate       | 1.112               | 0.088        | -                   | -            | 0.930               | 0.035        |
| $\alpha$ -Ketoglutarate       | 1.633               | 0.219        | 1.290               | 0.520        | -                   | -            |
| Acetyl L Carnitine            | 1.040               | 0.050        | 0.947               | 0.020        | 1.000               | 0.073        |
| Acetyl-CoA                    | 1.011               | 0.236        | 0.946               | 0.227        | 0.737               | 0.158        |
| Aconitate                     | 1.376               | 0.122        | 0.929               | 0.127        | 1.053               | 0.133        |
| Adenine                       | 0.976               | 0.031        | 0.956               | 0.079        | 1.087               | 0.085        |
| Adenosine                     | 1.114               | 0.072        | 1.437               | 0.161        | 1.183               | 0.142        |
| ADP                           | 1.259               | 0.127        | 1.017               | 0.181        | 0.911               | 0.114        |
| AICAR                         | -                   | -            | 0.938               | 0.054        | -                   | -            |
| Alanine                       | 1.077               | 0.074        | 0.892               | 0.078        | 0.977               | 0.058        |
| Alanine                       | 1.047               | 0.065        | 1.090               | 0.127        | 1.014               | 0.025        |
| Amino adipic acid             | 0.922               | 0.146        | 0.456               | 0.096        | 0.824               | 0.046        |
| Ammonia                       | 1.524               | 0.292        | 1.454               | 0.054        | 0.995               | 0.411        |
| AMP                           | 0.984               | 0.074        | 1.173               | 0.118        | 1.535               | 0.185        |
| Arginosuccinate               | 1.387               | 0.186        | 0.779               | 0.096        | 0.985               | 0.137        |
| Asparagine                    | 0.965               | 0.071        | 1.182               | 0.227        | 0.800               | 0.228        |
| Aspartate                     | 1.122               | 0.107        | 0.864               | 0.072        | 0.969               | 0.086        |
| Aspartic acid                 | 1.068               | 0.084        | 1.053               | 0.215        | 0.894               | 0.056        |
| ATP                           | 1.604               | 0.261        | 1.053               | 0.215        | 0.433               | 0.075        |
| Beta-Alanine                  | 1.035               | 0.037        | 0.622               | 0.094        | 0.689               | 0.185        |
| Betaine                       | 0.909               | 0.031        | 0.913               | 0.035        | 1.002               | 0.068        |
| Biotin                        | 1.150               | 0.111        | 1.029               | 0.039        | 1.253               | 0.294        |
| Butyrylcarnitine              | 0.978               | 0.079        | 0.897               | 0.119        | 0.975               | 0.103        |
| cAMP                          | 1.181               | 0.117        | -                   | -            | 1.166               | 0.129        |
| Carnosine                     | 1.035               | 0.098        | 0.807               | 0.064        | 0.723               | 0.086        |
| Cholesterol                   | 1.191               | 0.219        | 0.677               | 0.048        | <b>3.694</b>        | <b>1.060</b> |
| Cis-aconitic acid             | 1.221               | 0.161        | 0.929               | 0.163        | 0.794               | 0.157        |
| Citrate                       | 1.209               | 0.084        | 1.242               | 0.343        | 0.897               | 0.099        |
| Citrate                       | 1.225               | 0.127        | 1.029               | 0.398        | 0.964               | 0.150        |
| Citrulline                    | 0.932               | 0.083        | 0.785               | 0.104        | 1.038               | 0.104        |
| Coenzyme A                    | -                   | -            | 1.321               | 0.300        | -                   | -            |
| Creatine                      | 1.021               | 0.043        | 0.864               | 0.114        | 1.064               | 0.081        |
| Creatinine                    | 0.989               | 0.084        | 1.287               | 0.190        | 0.877               | 0.068        |
| Cystathionine                 | 1.010               | 0.087        | 0.797               | 0.094        | 0.516               | 0.173        |
| Cystathionine                 | 1.036               | 0.145        | 2.084               | 0.261        | 0.983               | 0.101        |
| Cysteine                      | 1.071               | 0.111        | 0.916               | 0.124        | 0.849               | 0.310        |
| Cystine                       | -                   | -            | 0.677               | 0.078        | -                   | -            |
| Cytidine                      | 0.931               | 0.087        | 0.585               | 0.311        | 0.929               | 0.108        |
| D-2-Hydroxyglutaric acid      | 1.021               | 0.047        | 0.861               | 0.091        | -                   | -            |
| D-Erythrose 4-phosphate       | 0.961               | 0.052        | 0.881               | 0.080        | 1.221               | 0.071        |
| D-Ribulose 5-phosphate        | 1.073               | 0.047        | 0.597               | 0.090        | 1.461               | 0.165        |
| Decanoylcarnitine             | 1.075               | 0.167        | 1.083               | 0.216        | 1.002               | 0.116        |
| Erythritol                    | 0.989               | 0.050        | 0.887               | 0.057        | 0.979               | 0.098        |
| FMN                           | -                   | -            | 0.692               | 0.038        | -                   | -            |

|                            |       |       |              |              |       |       |
|----------------------------|-------|-------|--------------|--------------|-------|-------|
| Fructose 1,6-bisphosphate  | 1.071 | 0.085 | -            | -            | -     | -     |
| Fumarate                   | 1.169 | 0.057 | 1.805        | 0.285        | 0.987 | 0.116 |
| GABA                       | 0.948 | 0.055 | 1.092        | 0.120        | 0.865 | 0.426 |
| Gamma-Aminobutyric acid    | 0.973 | 0.031 | 0.950        | 0.069        | 1.052 | 0.228 |
| Glucose                    | -     | -     | 0.871        | 0.115        | 1.027 | 0.050 |
| Glucose 1-phosphate        | 1.015 | 0.051 | 1.147        | 0.136        | 1.137 | 0.053 |
| Glucose 6-phosphate        | 0.994 | 0.054 | 1.180        | 0.133        | 1.116 | 0.050 |
| Glutamate                  | 0.998 | 0.046 | 1.039        | 0.042        | 0.953 | 0.110 |
| Glutamic acid              | 1.011 | 0.034 | 0.899        | 0.024        | 0.858 | 0.040 |
| Glutathione                | 1.600 | 0.325 | 1.126        | 0.656        | -     | -     |
| Glyceraldehyde 3-phosphate | 0.965 | 0.050 | 0.829        | 0.157        | 0.823 | 0.129 |
| Glycine                    | 1.080 | 0.070 | 0.881        | 0.033        | 1.024 | 0.117 |
| Glycine                    | 1.071 | 0.069 | 0.979        | 0.051        | 0.978 | 0.047 |
| GMP                        | 0.911 | 0.045 | 1.628        | 0.092        | 1.280 | 0.174 |
| Guanine                    | 1.060 | 0.083 | 0.883        | 0.060        | 0.856 | 0.082 |
| Guanosine                  | 1.066 | 0.088 | 0.910        | 0.081        | 1.178 | 0.127 |
| Guanosine 5'-phosphate     | 1.669 | 0.292 | 0.852        | 0.169        | 0.534 | 0.074 |
| Heptadecanoic acid         | 1.026 | 0.082 | 0.679        | 0.050        | 1.154 | 0.121 |
| Hexanoylcarnitine          | 0.957 | 0.175 | 0.935        | 0.127        | 1.231 | 0.162 |
| Hippurate                  | -     | -     | 0.579        | 0.207        | -     | -     |
| Histamine                  | -     | -     | 0.680        | 0.250        | 0.647 | 0.082 |
| Histidine                  | 1.243 | 0.092 | 0.753        | 0.040        | 0.562 | 0.191 |
| Histidine                  | 1.041 | 0.086 | 1.876        | 0.146        | 0.636 | 0.045 |
| Hypotaurine                | 0.915 | 0.132 | 0.803        | 0.059        | -     | -     |
| Hypothanxine               | 0.998 | 0.067 | 0.783        | 0.057        | 1.112 | 0.262 |
| Hypoxanthine               | 0.938 | 0.078 | 0.907        | 0.067        | 1.198 | 0.114 |
| IMP                        | 0.968 | 0.059 | 1.418        | 0.113        | 1.362 | 0.166 |
| Inosine                    | 1.255 | 0.151 | 0.843        | 0.049        | 1.710 | 0.247 |
| Isobutyrylcarnitine        | 1.003 | 0.057 | 0.908        | 0.112        | 0.947 | 0.090 |
| Isocitrate                 | 1.211 | 0.110 | -            | -            | 0.700 | 0.082 |
| Isoleucine                 | 0.902 | 0.031 | 0.882        | 0.074        | 0.879 | 0.114 |
| Isopentenyl pyrophosphate  | 0.922 | 0.082 | 1.045        | 0.245        | 1.069 | 0.054 |
| L-Arginine                 | 1.024 | 0.102 | 0.725        | 0.054        | 0.633 | 0.093 |
| L-Asparagine               | 0.866 | 0.054 | 0.755        | 0.064        | 0.626 | 0.091 |
| L-Homoserine               | 1.039 | 0.080 | 0.793        | 0.072        | 0.869 | 0.103 |
| Lactate                    | 1.039 | 0.017 | 1.067        | 0.041        | 0.878 | 0.075 |
| Lactate                    | 1.011 | 0.024 | 1.051        | 0.041        | 1.299 | 0.147 |
| Leucine                    | 0.964 | 0.064 | 0.919        | 0.051        | 0.918 | 0.128 |
| Leucine                    | 1.015 | 0.065 | 0.945        | 0.073        | 0.900 | 0.114 |
| Lysine                     | 1.188 | 0.046 | 0.752        | 0.025        | 0.548 | 0.181 |
| Lysine                     | 0.976 | 0.131 | 1.352        | 0.087        | 0.689 | 0.144 |
| Malate                     | 1.069 | 0.024 | 1.526        | 0.401        | 0.987 | 0.119 |
| Malate                     | 1.130 | 0.061 | 1.951        | 0.699        | 1.102 | 0.085 |
| Methionine                 | 0.957 | 0.086 | 0.731        | 0.074        | 0.636 | 0.056 |
| Methionine                 | 0.924 | 0.076 | 0.821        | 0.103        | 0.594 | 0.075 |
| Myo inositol               | 1.201 | 0.133 | 1.100        | 0.035        | 1.012 | 0.071 |
| Myristic acid-D27          | 0.877 | 0.040 | 0.819        | 0.066        | 1.237 | 0.142 |
| Myristoylcarnitine         | 0.887 | 0.099 | 0.649        | 0.206        | 0.821 | 0.088 |
| N-alpha-Acetyl-L-lysine    | 1.009 | 0.125 | 0.758        | 0.144        | 0.751 | 0.085 |
| N-Asp                      | 0.965 | 0.093 | <b>2.685</b> | <b>0.362</b> | 0.628 | 0.265 |
| Ornithine                  | 0.746 | 0.045 | 0.956        | 0.123        | 0.640 | 0.216 |
| Ornithine                  | 1.052 | 0.125 | 1.103        | 0.124        | -     | -     |
| Oxalic acid                | 1.039 | 0.078 | 1.064        | 0.060        | 1.221 | 0.201 |

|                        |              |              |              |              |       |       |
|------------------------|--------------|--------------|--------------|--------------|-------|-------|
| Oxalic acid            | 0.758        | 0.108        | 0.593        | 0.062        | 1.090 | 0.188 |
| Oxidized glutathione   | 1.105        | 0.129        | 1.871        | 0.327        | 0.691 | 0.048 |
| Palmitate              | 0.993        | 0.035        | 1.024        | 0.036        | 1.015 | 0.069 |
| Palmitoylcarnitine     | 1.060        | 0.125        | 0.540        | 0.111        | 0.934 | 0.125 |
| Palmitoyl-CoA          | <b>1.769</b> | <b>0.414</b> | 0.812        | 0.127        | 1.394 | 0.319 |
| Pantothenic acid       | 0.960        | 0.092        | 1.060        | 0.141        | 0.810 | 0.132 |
| Pantothenic acid       | 0.962        | 0.095        | 0.851        | 0.215        | 1.104 | 0.163 |
| PEP                    | 1.511        | 0.363        | <b>3.943</b> | <b>2.057</b> | 0.993 | 0.243 |
| Phenylalanine          | 0.986        | 0.054        | 0.909        | 0.072        | 0.970 | 0.063 |
| Phenylalanine          | 1.013        | 0.057        | 0.786        | 0.043        | 0.803 | 0.052 |
| Phosphocreatine        | 1.102        | 0.078        | 0.897        | 0.214        | 0.987 | 0.158 |
| Phosphoserine          | -            | -            | 1.247        | 0.116        | -     | -     |
| Propionylcarnitine     | 1.044        | 0.141        | 0.821        | 0.067        | 0.804 | 0.127 |
| Pyroglutamic acid      | 1.153        | 0.106        | 0.751        | 0.096        | 1.022 | 0.102 |
| Pyruvate               | <b>1.698</b> | <b>0.196</b> | 0.592        | 0.140        | 1.016 | 0.080 |
| Riboflavin             | 0.831        | 0.062        | 0.670        | 0.078        | 0.551 | 0.066 |
| Ribose 5-phosphate     | -            | -            | 0.535        | 0.086        | -     | -     |
| Serine                 | 1.036        | 0.051        | 0.809        | 0.063        | 0.865 | 0.113 |
| Serine                 | 1.045        | 0.063        | 0.919        | 0.108        | 0.938 | 0.065 |
| Stearic acid           | 0.993        | 0.033        | 1.009        | 0.023        | 0.994 | 0.056 |
| Succinate              | 1.001        | 0.014        | 1.111        | 0.056        | 0.915 | 0.110 |
| Succinate              | 0.978        | 0.027        | 1.109        | 0.137        | 0.998 | 0.050 |
| Succinyl-CoA           | 1.305        | 0.193        | 0.930        | 0.185        | 1.004 | 0.344 |
| Taurine                | 0.979        | 0.020        | 1.041        | 0.043        | 0.701 | 0.195 |
| Taurine                | 0.791        | 0.129        | 1.325        | 0.071        | 1.009 | 0.019 |
| Thiamine               | 1.041        | 0.264        | 1.022        | 0.121        | 0.615 | 0.186 |
| Thiamine Monophosphate | -            | -            | 0.889        | 0.045        | -     | -     |
| Thiamine Pyrophosphate | -            | -            | 1.047        | 0.114        | -     | -     |
| Threonine              | 1.048        | 0.069        | 0.766        | 0.077        | 0.680 | 0.259 |
| Threonine              | 1.218        | 0.221        | 0.955        | 0.154        | 0.846 | 0.095 |
| Tyrosine               | 0.914        | 0.096        | 0.813        | 0.086        | 0.883 | 0.147 |
| Tyrosine               | 0.849        | 0.103        | 0.872        | 0.111        | 0.762 | 0.052 |
| UDP                    | 1.256        | 0.158        | 1.156        | 0.154        | 0.878 | 0.117 |
| UDP-Glucose            | 1.460        | 0.131        | 1.115        | 0.083        | 1.025 | 0.106 |
| Uracil                 | 0.893        | 0.096        | 1.017        | 0.075        | 0.962 | 0.081 |
| Uracil                 | 0.884        | 0.061        | 1.011        | 0.082        | 1.086 | 0.173 |
| Urate                  | 1.021        | 0.303        | 0.965        | 0.231        | 1.280 | 0.136 |
| Urea                   | 1.080        | 0.118        | 0.843        | 0.097        | 0.918 | 0.171 |
| Valine                 | 0.983        | 0.042        | 0.968        | 0.122        | 0.898 | 0.083 |
| Valine                 | 1.005        | 0.054        | 0.908        | 0.071        | 0.979 | 0.099 |
| Xanthine               | 1.273        | 0.305        | 0.865        | 0.072        | 1.025 | 0.235 |
| Xanthine               | 1.354        | 0.179        | 0.713        | 0.055        | 1.529 | 0.222 |

Red bold indicates statistical significance  $P < 0.05$ . - indicates that measurable amounts of that metabolite were not detected. Repeated metabolites represent measurements by both LC/MS and GC/MS.

**Table S3. Metabolite Levels in MUT Tissue Relative to WT- 4 Weeks of Age**

| Metabolite                     | Retina- Fold Change |       | Kidney- Fold Change |              | Eyecup- Fold Change |       |
|--------------------------------|---------------------|-------|---------------------|--------------|---------------------|-------|
|                                | Mean                | SEM   | Mean                | SEM          | Mean                | SEM   |
| 1-Methyladenosine              | 0.669               | 0.148 | 0.830               | 0.139        | 1.758               | 0.342 |
| 2-hydroxyglutarate/Mevalonate  | 0.797               | 0.059 | 1.417               | 0.203        | 0.900               | 0.092 |
| 2-Methylbutyrylcarnitine       | 1.687               | 0.701 | 1.109               | 0.084        | 0.927               | 0.123 |
| 3-Aminoisobutanoic acid        | 1.327               | 0.604 | 1.004               | 0.035        | 1.095               | 0.164 |
| 3PG                            | 1.694               | 0.134 | 1.454               | 0.412        | 1.129               | 0.106 |
| 4-Hydroxyproline               | 1.037               | 0.071 | 1.143               | 0.111        | 1.197               | 0.159 |
| 5-oxoproline                   | 1.102               | 0.069 | 1.005               | 0.072        | 0.912               | 0.104 |
| $\alpha$ -Ketoglutarate        | 1.341               | 0.165 | 1.068               | 0.283        | 0.881               | 0.143 |
| Acetyl coa                     | 0.741               | 0.218 | <b>2.637</b>        | <b>0.440</b> | 0.558               | 0.086 |
| Acetyl L carnitine             | 1.234               | 0.296 | 0.998               | 0.014        | 1.027               | 0.038 |
| AcetylCholine                  | 2.144               | 1.028 | 1.120               | 0.073        | 0.674               | 0.149 |
| Acetylglutamic acid            | 0.666               | 0.179 | 0.953               | 0.059        | -                   | -     |
| Aconitate                      | 0.849               | 0.196 | 0.758               | 0.152        | 0.662               | 0.101 |
| Adenine                        | 1.148               | 0.168 | 1.469               | 0.217        | 1.152               | 0.086 |
| Adenosine                      | 1.301               | 0.548 | 1.150               | 0.101        | 0.788               | 0.166 |
| ADP                            | 1.404               | 0.791 | 2.354               | 0.628        | 0.546               | 0.106 |
| AICAR                          | 0.965               | 0.302 | 0.915               | 0.072        | 0.693               | 0.079 |
| Alanine                        | 1.025               | 0.530 | 0.973               | 0.033        | 0.956               | 0.107 |
| Alanine                        | 1.144               | 0.067 | 0.972               | 0.065        | 0.994               | 0.099 |
| Amino adipic acid              | 0.826               | 0.298 | 1.368               | 0.212        | 0.410               | 0.050 |
| Arginosuccinate                | 1.964               | 0.573 | 1.589               | 0.115        | 0.943               | 0.137 |
| Ascorbic acid                  | 0.392               | 0.167 | 1.320               | 0.123        | 0.999               | 0.612 |
| Asparagine                     | 1.284               | 0.080 | 0.865               | 0.086        | 0.952               | 0.142 |
| Aspartate                      | 1.293               | 0.063 | 1.012               | 0.136        | 1.163               | 0.126 |
| Aspartic acid                  | 1.640               | 0.800 | 1.064               | 0.096        | 0.915               | 0.108 |
| Betaine                        | 1.363               | 0.663 | 0.988               | 0.021        | 1.064               | 0.077 |
| Biotin                         | 0.967               | 0.098 | 0.944               | 0.052        | 0.894               | 0.069 |
| Butyrylcarnitine               | 1.748               | 0.894 | 1.133               | 0.109        | 0.793               | 0.107 |
| cAMP                           | 2.500               | 1.276 | 0.926               | 0.159        | 0.769               | 0.103 |
| Carnosine                      | 0.883               | 0.257 | 0.776               | 0.130        | 0.692               | 0.061 |
| Cholesterol                    | 1.263               | 0.172 | 0.771               | 0.123        | 0.932               | 0.328 |
| Cis-aconitic acid              | 1.354               | 0.106 | 0.942               | 0.263        | 0.895               | 0.122 |
| Citraconic acid                | 1.596               | 0.416 | 1.156               | 0.099        | 0.613               | 0.115 |
| Citrate                        | 1.359               | 0.073 | 1.157               | 0.387        | 0.846               | 0.096 |
| Citrulline                     | 0.826               | 0.228 | 0.945               | 0.043        | 0.795               | 0.058 |
| Co Enzyme A                    | 0.449               | 0.138 | 1.522               | 0.198        | -                   | -     |
| Creatine                       | 1.150               | 0.335 | 1.062               | 0.061        | 0.947               | 0.070 |
| Cyclic ADP-ribose              | 0.763               | 0.171 | 1.764               | 0.363        | 0.553               | 0.067 |
| Cystathionine                  | 1.498               | 0.152 | 1.105               | 0.116        | 0.925               | 0.129 |
| Cystine                        | 1.388               | 0.165 | 1.224               | 0.097        | 1.308               | 0.453 |
| Cytidine                       | 1.482               | 0.339 | 0.874               | 0.111        | 0.874               | 0.106 |
| D-Ribulose 5-phosphate         | 0.917               | 0.251 | 0.841               | 0.096        | 0.838               | 0.100 |
| Erythritol                     | 0.882               | 0.189 | 0.989               | 0.023        | 0.861               | 0.126 |
| Fumarate                       | 1.321               | 0.089 | 1.021               | 0.185        | 1.105               | 0.206 |
| Gamma-Aminobutyric acid (GABA) | 1.130               | 0.046 | 0.975               | 0.123        | 1.718               | 0.709 |
| Gamma-Aminobutyric acid (GABA) | 1.082               | 0.255 | 1.046               | 0.156        | 1.145               | 0.381 |
| GDP                            | 1.137               | 0.246 | 2.027               | 0.529        | 0.522               | 0.000 |
| Glucose                        | -                   | -     | 0.982               | 0.099        | 0.654               | 0.054 |
| Glucose 1-phosphate            | 1.250               | 0.336 | 1.526               | 0.239        | 0.696               | 0.076 |
| Glucose 6-phosphate            | 1.155               | 0.229 | 1.582               | 0.254        | 0.819               | 0.077 |
| Glutamate                      | 1.016               | 0.049 | 1.076               | 0.046        | 1.002               | 0.140 |
| Glutamic acid                  | 1.544               | 0.723 | 0.950               | 0.027        | 0.809               | 0.089 |

|                         |              |              |              |              |       |       |
|-------------------------|--------------|--------------|--------------|--------------|-------|-------|
| Glutathione             | 0.836        | 0.136        | 0.595        | 0.189        | -     | -     |
| Glycerate               | 1.158        | 0.306        | 1.210        | 0.472        | 0.961 | 0.159 |
| Glycine                 | 1.282        | 0.589        | 1.046        | 0.042        | 0.872 | 0.089 |
| Glycine                 | 1.168        | 0.053        | 1.039        | 0.039        | 0.795 | 0.076 |
| GMP                     | 0.903        | 0.163        | 1.925        | 0.608        | 0.812 | 0.103 |
| Guanine                 | 0.939        | 0.129        | 1.471        | 0.264        | 1.042 | 0.077 |
| Guanosine               | 0.813        | 0.181        | 1.675        | 0.332        | 0.855 | 0.103 |
| Guanosine 5'-phosphate  | 1.063        | 0.166        | 2.087        | 0.573        | 0.630 | 0.068 |
| Hexanoylcarnitine       | 0.891        | 0.146        | 0.795        | 0.081        | 0.911 | 0.139 |
| Histidine               | 1.084        | 0.137        | 1.079        | 0.063        | 0.836 | 0.114 |
| Histidine               | 1.359        | 0.137        | 1.078        | 0.058        | 0.690 | 0.127 |
| Hypotaurine             | 0.854        | 0.259        | 1.120        | 0.109        | 0.410 | 0.078 |
| Hypothanxine            | 1.239        | 0.405        | 0.874        | 0.075        | 0.905 | 0.121 |
| Hypoxanthine            | 0.633        | 0.167        | 0.857        | 0.079        | 0.949 | 0.095 |
| IMP                     | 1.519        | 0.781        | <b>2.219</b> | <b>0.645</b> | 0.736 | 0.107 |
| Inosine                 | 1.725        | 1.086        | 0.728        | 0.110        | 0.802 | 0.177 |
| Inosine                 | 1.552        | 0.651        | 0.951        | 0.023        | 0.773 | 0.145 |
| IPP                     | 2.263        | 0.982        | 1.003        | 0.087        | 0.805 | 0.151 |
| Isobutyrylcarnitine     | 1.342        | 0.530        | 1.149        | 0.104        | 0.794 | 0.117 |
| Isocitrate              | 1.401        | 0.149        | 1.129        | 0.100        | 0.961 | 0.108 |
| Isoleucine              | 1.085        | 0.064        | 1.041        | 0.018        | 0.863 | 0.101 |
| L-Arginine              | 0.822        | 0.051        | 1.212        | 0.083        | 0.827 | 0.068 |
| L-Asparagine            | 0.600        | 0.176        | 0.925        | 0.089        | 0.944 | 0.162 |
| L-Homoserine            | 1.050        | 0.107        | 1.003        | 0.035        | 0.742 | 0.060 |
| Lactate                 | 1.115        | 0.207        | 1.083        | 0.037        | 0.828 | 0.142 |
| Lactate                 | 1.073        | 0.066        | 1.011        | 0.037        | 0.744 | 0.081 |
| Leucine                 | 1.380        | 0.648        | 1.013        | 0.036        | 0.864 | 0.108 |
| Leucine                 | 1.115        | 0.062        | 0.991        | 0.028        | 0.782 | 0.078 |
| Lysine                  | 1.455        | 0.586        | 1.079        | 0.050        | 0.818 | 0.081 |
| Lysine                  | 1.371        | 0.102        | 1.005        | 0.042        | 0.672 | 0.070 |
| Malate                  | 1.520        | 0.695        | 0.820        | 0.355        | 1.004 | 0.103 |
| Malate                  | 1.251        | 0.070        | 0.705        | 0.234        | 0.893 | 0.066 |
| Maleic acid             | 0.991        | 0.009        | 1.007        | 0.010        | 0.981 | 0.010 |
| Methionine              | 1.405        | 0.514        | 1.094        | 0.089        | 0.837 | 0.106 |
| Methionine              | 1.116        | 0.061        | 1.054        | 0.115        | 0.777 | 0.100 |
| Myo inositol            | 2.192        | 1.003        | 0.913        | 0.049        | 0.934 | 0.134 |
| Myristic acid-D27       | 0.980        | 0.032        | 1.036        | 0.017        | 0.994 | 0.052 |
| Myristoylcarnitine      | 1.323        | 0.590        | 0.891        | 0.235        | 0.699 | 0.128 |
| N-alpha-acetyl-L-lysine | 2.371        | 1.165        | 1.104        | 0.069        | 0.913 | 0.097 |
| N-Asp                   | 1.153        | 0.068        | 1.069        | 0.101        | 0.917 | 0.176 |
| Ornithine               | 1.379        | 0.058        | 0.948        | 0.716        | 0.810 | 0.086 |
| Oxalic acid             | 0.730        | 0.109        | 1.004        | 0.506        | 1.038 | 0.079 |
| Oxalic acid             | 1.016        | 0.069        | 1.005        | 0.056        | 0.867 | 0.049 |
| Oxidized glutathione    | 1.940        | 1.093        | 0.916        | 0.025        | 0.859 | 0.089 |
| Palmitate               | 1.002        | 0.018        | 0.940        | 0.062        | 0.964 | 0.017 |
| Palmitoyl CoA           | 0.872        | 0.170        | 1.075        | 0.706        | 0.913 | 0.165 |
| Palmitoylcarnitine      | 1.335        | 0.421        | 0.529        | 0.024        | 0.660 | 0.079 |
| Pantothenic acid        | 1.611        | 0.403        | 1.128        | 0.110        | 0.795 | 0.079 |
| Pantothenic acid        | 0.968        | 0.102        | 1.063        | 0.173        | 0.702 | 0.079 |
| PEP                     | <b>2.137</b> | <b>0.413</b> | 1.492        | 0.047        | 0.903 | 0.096 |
| Phenylalanine           | 1.201        | 0.074        | 1.018        | 0.047        | 0.907 | 0.102 |
| phenylalanine           | 1.452        | 0.644        | 1.000        | 0.460        | 0.803 | 0.090 |
| Phosphocreatine         | 1.835        | 0.942        | 1.247        | 0.029        | 1.079 | 0.238 |
| Propionylcarnitine      | 1.650        | 0.757        | 1.172        | 0.053        | 0.893 | 0.219 |
| Pyroglutamic acid       | 1.746        | 0.843        | 1.015        | 0.064        | 0.764 | 0.102 |



|                        |       |       |       |       |       |       |
|------------------------|-------|-------|-------|-------|-------|-------|
| Pyruvate               | 1.541 | 0.238 | 1.314 | 0.075 | 0.975 | 0.197 |
| Riboflavin             | 0.756 | 0.221 | 1.015 | 0.060 | 1.158 | 0.144 |
| Serine                 | 0.821 | 0.075 | 1.014 | 0.095 | 0.896 | 0.075 |
| Serine                 | 1.073 | 0.068 | 0.935 | 0.102 | 0.763 | 0.071 |
| Sphinganine            | 0.746 | 0.139 | 1.296 | 0.034 | 0.971 | 0.169 |
| Stearic acid           | 1.019 | 0.018 | 0.994 | 0.045 | 0.973 | 0.014 |
| Stearyl carnitine      | 0.503 | 0.114 | 0.661 | 0.232 | 0.694 | 0.104 |
| Succinate              | 1.405 | 0.372 | 1.298 | 0.011 | 0.926 | 0.102 |
| Succinate              | 0.957 | 0.061 | 1.149 | 0.221 | 0.932 | 0.054 |
| Succinyl CoA           | 0.780 | 0.230 | 1.584 | 0.081 | 0.497 | 0.087 |
| Taurine                | 0.815 | 0.131 | 1.050 | 0.035 | 1.034 | 0.118 |
| Taurine                | 0.849 | 0.062 | 1.202 | 0.185 | 0.747 | 0.083 |
| Thiamine               | 0.741 | 0.233 | 0.917 | 0.097 | -     | -     |
| Thiamine monophosphate | 0.663 | 0.194 | 1.063 | 0.061 | 0.734 | 0.097 |
| Thiamine pyrophosphate | 0.684 | 0.204 | 1.122 | 0.101 | 1.057 | 0.261 |
| Threonine              | 0.722 | 0.210 | 1.083 | 0.086 | 0.911 | 0.077 |
| Threonine              | 1.106 | 0.108 | 0.994 | 0.229 | 0.712 | 0.058 |
| Tryptophan             | 0.745 | 0.211 | 1.061 | 0.027 | 0.847 | 0.175 |
| Tryptophan             | 1.519 | 0.290 | 1.027 | 0.105 | 0.670 | 0.099 |
| Tyrosine               | 0.873 | 0.249 | 1.062 | 0.034 | 0.951 | 0.082 |
| Tyrosine               | 1.205 | 0.071 | 1.014 | 0.044 | 0.688 | 0.052 |
| UDP                    | 1.373 | 0.662 | 1.848 | 0.040 | 0.575 | 0.076 |
| UDP glucosamine        | 0.939 | 0.282 | 1.125 | 0.115 | 0.817 | 0.085 |
| UDP-glucose            | 0.931 | 0.273 | 1.032 | 0.421 | 0.825 | 0.085 |
| Uracil                 | 1.704 | 0.295 | 0.930 | 0.111 | 0.850 | 0.075 |
| Uracil                 | 1.050 | 0.102 | 0.932 | 0.094 | 0.981 | 0.064 |
| Urate                  | 1.494 | 0.291 | 2.485 | 0.051 | 0.922 | 0.229 |
| Urea                   | 1.211 | 0.076 | 0.861 | 0.034 | 0.656 | 0.125 |
| Valine                 | 0.951 | 0.137 | 1.011 | 0.093 | 0.828 | 0.095 |
| Valine                 | 1.028 | 0.059 | 0.997 | 0.110 | 0.711 | 0.067 |
| Xanthine               | 0.600 | 0.176 | 0.925 | 0.022 | 0.837 | 0.184 |
| Xanthine               | 1.537 | 0.671 | 0.937 | 0.049 | 1.300 | 0.184 |
| XMP                    | 0.895 | 0.252 | 1.418 | 0.062 | 0.843 | 0.112 |

Red bold indicates statistical significance  $P < 0.05$ . - indicates that measurable amounts of that metabolite were not detected. Repeated metabolites represent measurements by both LC/MS and GC/MS.

**Table S4. Altered Metabolites Longitudinal Analysis**

| <b>Metabolite</b>            | <b>Adjusted P Value</b> |
|------------------------------|-------------------------|
| <b>LC-MS Retina</b>          |                         |
| Adenosine                    |                         |
| 2 Weeks-MUT vs. 2 Weeks-WT   | <0.0001                 |
| 2 Weeks-MUT vs. 4 Weeks-MUT  | <0.0001                 |
| 2 Weeks-MUT vs. 4 Weeks-WT   | <0.0001                 |
| 2 Weeks-MUT vs. 3 Weeks-MUT  | <0.0001                 |
| 2 Weeks-MUT vs. 3 weeks-WT   | <0.0001                 |
|                              |                         |
| Carnosine                    |                         |
| 2 Weeks-MUT vs. 2 Weeks-WT   | 0.0235                  |
| 2 Weeks-MUT vs. 4 Weeks-MUT  | 0.0126                  |
| 2 Weeks-MUT vs. 4 Weeks-WT   | 0.0235                  |
|                              |                         |
| Inosine                      |                         |
| 2 Weeks-MUT vs. 2 Weeks-WT   | <0.0001                 |
| 2 Weeks-MUT vs. 4 Weeks-MUT  | <0.0001                 |
| 2 Weeks-MUT vs. 4 Weeks-WT   | <0.0001                 |
| 2 Weeks-MUT vs. 3 Weeks-MUT  | <0.0001                 |
| 2 Weeks-MUT vs. 3 weeks-WT   | <0.0001                 |
|                              |                         |
| Propionyl Carnitine          |                         |
| 2 Weeks-MUT vs. 2 Weeks-WT   | 0.0127                  |
| 2 Weeks-MUT vs. 4 Weeks-WT   | 0.0127                  |
| 2 Weeks-MUT vs. 3 Weeks-MUT  | 0.0366                  |
| 2 Weeks-MUT vs. 3 weeks-WT   | 0.0297                  |
|                              |                         |
| <b>GC-MS Retina</b>          |                         |
| Hypothanxine                 |                         |
| 2 Weeks-MUT vs. 2 Weeks-WT   | <0.0001                 |
| 2 Weeks-MUT vs. 4 Weeks-MUT  | <0.0001                 |
| 2 Weeks-MUT vs. 4 Weeks-WT   | <0.0001                 |
| 2 Weeks-MUT vs. 3 Weeks- WT  | <0.0001                 |
| 2 Weeks-MUT vs. 3 Weeks- MUT | <0.0001                 |
|                              |                         |
| PEP                          |                         |
| 2 Weeks-MUT vs. 4 Weeks-MUT  | 0.0041                  |
| 2 Weeks-WT vs. 4 Weeks-MUT   | 0.0156                  |
| 4 Weeks-MUT vs. 4 Weeks-WT   | 0.0156                  |
| 4 Weeks-MUT vs. 3 Weeks- WT  | 0.0331                  |
|                              |                         |
| Xanthine                     |                         |
| 2 Weeks-MUT vs. 2 Weeks-WT   | <0.0001                 |
| 2 Weeks-MUT vs. 4 Weeks-MUT  | <0.0001                 |

|                              |         |
|------------------------------|---------|
| 2 Weeks-MUT vs. 4 Weeks-WT   | <0.0001 |
| 2 Weeks-MUT vs. 3 Weeks- WT  | <0.0001 |
| 2 Weeks-MUT vs. 3 Weeks- MUT | <0.0001 |
|                              |         |
| <b>LC-MS Eyecup</b>          |         |
| 1-Methyladenosine            |         |
| 2 Weeks-MUT vs. 4 Weeks-MUT  | 0.0043  |
| 2 Weeks-WT vs. 4 Weeks-MUT   | 0.0354  |
| 4 Weeks-MUT vs. 4 Weeks-WT   | 0.0128  |
| 4 Weeks-MUT vs. 3 Weeks-WT   | 0.0128  |
| 4 Weeks-MUT vs. 3 Weeks-MUT  | 0.0033  |
|                              |         |
| Aminoadipic acid             |         |
| 2 Weeks-MUT vs. 4 Weeks-MUT  | 0.0197  |
| 2 Weeks-WT vs. 4 Weeks-MUT   | 0.0104  |
|                              |         |
| AMP                          |         |
| 2 Weeks-MUT vs. 3 Weeks-MUT  | 0.0175  |
| 4 Weeks-MUT vs. 3 Weeks-MUT  | 0.0066  |
|                              |         |
| Inosine                      |         |
| 4 Weeks-MUT vs. 3 Weeks-MUT  | 0.0007  |
| 4 Weeks-WT vs. 3 Weeks-MUT   | 0.0457  |
| 3 Weeks-WT vs. 3 Weeks-MUT   | 0.0457  |
|                              |         |
| Succinyl coenzyme A          |         |
| 2 Weeks-MUT vs. 4 Weeks-MUT  | 0.0032  |
| 2 Weeks-WT vs. 4 Weeks-MUT   | 0.038   |
|                              |         |
| Thiamine2                    |         |
| 2 Weeks-WT vs. 4 Weeks-MUT   | 0.0262  |
|                              |         |
| <b>LC-MS Kidney</b>          |         |
| Glutamine                    |         |
| 2 Weeks-MUT vs. 2 Weeks-WT   | <0.0001 |
| 2 Weeks-MUT vs. 4 Weeks-MUT  | <0.0001 |
| 2 Weeks-MUT vs. 4 Weeks-WT   | <0.0001 |
| 2 Weeks-MUT vs. 3 Weeks-WT   | <0.0001 |
| 2 Weeks-MUT vs. 3 Weeks-MUT  | <0.0001 |
|                              |         |
| <b>GC-MS Kidney</b>          |         |
| 3PG                          |         |
| 4 Week-MUT vs. 3 Week-MUT    | 0.0036  |
| 4 Week-WT vs. 2 Week-MUT     | 0.0036  |
| 4 Week-WT vs. 3 Week-MUT     | <0.0001 |

|                           |         |
|---------------------------|---------|
| 2 Week-MUT vs. 2 Week-WT  | 0.0036  |
| 2 Week-MUT vs. 3 Weeks-WT | 0.0096  |
| 2 Week-WT vs. 3 Week-MUT  | <0.0001 |
| 3 Weeks-WT vs. 3 Week-MUT | <0.0001 |
|                           |         |
| Cystathionine             |         |
| 4 Week-WT vs. 3 Week-MUT  | 0.0207  |
| 2 Week-WT vs. 3 Week-MUT  | 0.0207  |
| 3 Weeks-WT vs. 3 Week-MUT | 0.0384  |
|                           |         |
| PEP                       |         |
| 4 Week-MUT vs. 3 Week-MUT | <0.0001 |
| 4 Week-WT vs. 2 Week-MUT  | 0.0034  |
| 4 Week-WT vs. 3 Week-MUT  | <0.0001 |
| 2 Week-MUT vs. 2 Week-WT  | 0.0034  |
| 2 Week-MUT vs. 3 Weeks-WT | 0.0091  |
| 2 Week-MUT vs. 3 Week-MUT | <0.0001 |
| 2 Week-WT vs. 3 Week-MUT  | <0.0001 |
| 3 Weeks-WT vs. 3 Week-MUT | <0.0001 |

**Table S8. RNA Sequencing Biological Replicates and RIN Numbers**

| Mouse ID | Sample ID | Age     | Tissue | Confirmed Nmnat1 Genotype | Sex    | RIN Number |
|----------|-----------|---------|--------|---------------------------|--------|------------|
| 8001     | 10A       | 2 Weeks | Retina | WT                        | Male   | 9.8        |
| 8036     | 11A       | 2 Weeks | Retina | WT                        | Male   | 9.7        |
| 8141     | 18A       | 2 Weeks | Retina | WT                        | Female | 9.7        |
| 7772     | 13A       | 2 Weeks | Retina | WT                        | Male   | 9.5        |
| 7997     | 14A       | 2 Weeks | Retina | WT                        | Male   | 9.6        |
| 8003     | 15A       | 2 Weeks | Retina | WT                        | Male   | 9.4        |
| 7774     | 1A        | 2 Weeks | Retina | MUT                       | Female | 9.3        |
| 7778     | 2A        | 2 Weeks | Retina | MUT                       | Female | 9.4        |
| 8039     | 3A        | 2 Weeks | Retina | MUT                       | Female | 9.4        |
| 7761     | 8A        | 2 Weeks | Retina | MUT                       | Male   | 9.5        |
| 7994     | 5A        | 2 Weeks | Retina | MUT                       | Female | 9.4        |
| 8084     | 6A        | 2 Weeks | Retina | MUT                       | Female | 9.6        |
| 7995     | 9C        | 2 Weeks | Kidney | WT                        | Male   | 9.1        |
| 7772     | 13C       | 2 Weeks | Kidney | WT                        | Male   | 9.3        |
| 8001     | 10C       | 2 Weeks | Kidney | WT                        | Male   | 9.4        |
| 8036     | 11C       | 2 Weeks | Kidney | WT                        | Male   | 9.4        |
| 8141     | 18C       | 2 Weeks | Kidney | WT                        | Female | 9.6        |
| 7997     | 14C       | 2 Weeks | Kidney | WT                        | Male   | 8.7        |
| 8003     | 15C       | 2 Weeks | Kidney | WT                        | Male   | 8.6        |
| 7778     | 2C        | 2 Weeks | Kidney | MUT                       | Female | 9.4        |
| 7994     | 5C        | 2 Weeks | Kidney | MUT                       | Female | 9.7        |
| 8039     | 3C        | 2 Weeks | Kidney | MUT                       | Female | 9.2        |
| 8017     | 17C       | 2 Weeks | Kidney | MUT                       | Female | 9.3        |
| 8084     | 6C        | 2 Weeks | Kidney | MUT                       | Female | 8.6        |
| 7532     | 5A        | 3 weeks | Retina | WT                        | Female | 9.2        |
| 7479     | 6A        | 3 weeks | Retina | WT                        | Female | 8.7        |
| 7586     | 7A        | 3 weeks | Retina | WT                        | Female | 9.1        |
| 7538     | 13A       | 3 weeks | Retina | WT                        | Male   | 9.2        |
| 7504     | 14A       | 3 weeks | Retina | WT                        | Male   | 8.8        |
| 7578     | 16A       | 3 weeks | Retina | WT                        | Male   | 9.3        |
| 7435     | 2A        | 3 weeks | Retina | MUT                       | Female | 8.7        |
| 7587     | 3A        | 3 weeks | Retina | MUT                       | Female | 8.8        |
| 7432     | 4A        | 3 weeks | Retina | MUT                       | Female | 9.0        |
| 7487     | 10A       | 3 weeks | Retina | MUT                       | Male   | 8.9        |
| 7509     | 11A       | 3 weeks | Retina | MUT                       | Male   | 9.1        |
| 7503     | 9A        | 3 weeks | Retina | MUT                       | Male   | 9.4        |
| 7532     | 5C        | 3 weeks | Kidney | WT                        | Female | 8.6        |
| 7479     | 6C        | 3 weeks | Kidney | WT                        | Female | 9.3        |
| 7586     | 7C        | 3 weeks | Kidney | WT                        | Female | 9.1        |
| 7585     | 8C        | 3 weeks | Kidney | WT                        | Female | 9.7        |
| 7504     | 14C       | 3 weeks | Kidney | WT                        | Male   | 8.8        |
| 7507     | 15C       | 3 weeks | Kidney | WT                        | Male   | 9.5        |
| 7433     | 1C        | 3 weeks | Kidney | MUT                       | Female | 9.4        |
| 7435     | 2C        | 3 weeks | Kidney | MUT                       | Female | 9.1        |
| 7587     | 3C        | 3 weeks | Kidney | MUT                       | Female | 9.6        |
| 7432     | 4C        | 3 weeks | Kidney | MUT                       | Female | 8.8        |
| 7509     | 11C       | 3 weeks | Kidney | MUT                       | Male   | 8.9        |
| 7503     | 9C        | 3 weeks | Kidney | MUT                       | Male   | 9.2        |

**Table S9. Primer Sequences and Efficiencies**

| Target         | Forward (5'-->3')       | Reverse (5'-->3')       | Efficiency (%) | Ascession Number/Reference     |
|----------------|-------------------------|-------------------------|----------------|--------------------------------|
| <i>Gadd45b</i> | GCTCTGGGGATCTCCGTG      | CTGTCGGGGTCCACATTCAT    | 107            | NM_008655.1                    |
| <i>Gapdh</i>   | CATCACTGCCACCCAGAAGACTG | ATGCCAGTGAGCTTCCCGTTCAG | 98             | NM_001289726.1 /PMID: 26491017 |
| <i>Lad1</i>    | CTAGCACCGTCAAGCTAGGG    | ACGCAGATTCTCCTTTCGGA    | 96             | NM_133664.3                    |
| <i>Lif</i>     | AATGCCACCTGTGCCATACG    | CAACTTGGTCTTCTCTGTCCCG  | 104            | NM_008501.2 /PMID: 24008729    |

**Table S10. Antibodies and Dilutions**

| Antibody                        | Manufacturer              | Product ID     | Host   | WB Dilution | WB Molecular Weight (kDa) | IHC Dilution | Lot Number   |
|---------------------------------|---------------------------|----------------|--------|-------------|---------------------------|--------------|--------------|
| Beta Actin                      | Abcam                     | ab8226         | Mouse  | 1 to 5,000  | 42                        | -            | GR3249122-16 |
| Beta Actin                      | Abcam                     | ab8227         | Rabbit | 1 to 5,000  | 42                        | -            | GR3244314-1  |
| CD45                            | Invitrogen                | 14-0451-82     | Rat    | -           | -                         | 1 to 250     | 2269880      |
| DAPI                            | Molecular Probes          | D21490         | -      | -           | -                         | 1 to 7,500   | 1575898      |
| Gfap                            | Abcam                     | ab68428        | Rabbit | 1 to 10,000 | 50                        | 1 to 100     | GR257920-32  |
| HKII                            | Cell Signaling            | C64G5 (2867S)  | Rabbit | 1 to 1,000  | 102                       | -            | Lot 5        |
| Iba1                            | Wako                      | 019-19741      | Rabbit | -           | -                         | 1 to 250     | SKP3626      |
| Phospho-PKM2                    | Cell Signaling            | TYR105 (3827S) | Rabbit | 1 to 1,000  | 60                        | -            | Lot 3        |
| PKM2                            | Cell Signaling            | D78A4 (4053S)  | Rabbit | 1 to 1,000  | 60                        | 1 to 400     | Lot 6        |
| PMK1                            | Cell Signaling            | D30G6 (7067S)  | Rabbit | 1 to 1,000  | 60                        | 1 to 100     | Lot 4        |
| yH2AX                           | Trevigen/ R and D Systems | 4418-APC-020   | Rabbit | -           | -                         | 1 to 100     | CMFS0321012  |
| Donkey Anti-Rat AlexaFluor 488  | Invitrogen                | A21208         | Donkey | -           | -                         | 1 to 500     | 2180272      |
| Goat anti-Rabbit AlexaFluor 594 | Abcam                     | ab150080       | Goat   | -           | -                         | 1 to 500     | GR3323881-1  |
| Goat anti-mouse AlexaFluor 488  | Invitrogen                | A32723         | Goat   | -           | -                         | 1 to 500     | VC300588     |
| Goat anti-Rabbit Alexafluor 555 | Invitrogen                | A32732         | Goat   | -           | -                         | 1 to 500     | VC297826     |
